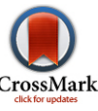

# Multi-Scale Associations between Vegetation Cover and Woodland Bird Communities across a Large Agricultural Region

Karen Ikin\*, Philip S. Barton, Ingrid A. Stirnemann, John R. Stein, Damian Michael, Mason Crane, Sachiko Okada, David B. Lindenmayer

Fenner School of Environment and Society, Australian Research Council Centre for Environmental Decisions, National Environmental Research Program Environmental Decisions Hub, The Australian National University, Canberra, Australia

## Abstract

Improving biodiversity conservation in fragmented agricultural landscapes has become an important global issue. Vegetation at the patch and landscape-scale is important for species occupancy and diversity, yet few previous studies have explored multi-scale associations between vegetation and community assemblages. Here, we investigated how patch and landscape-scale vegetation cover structure woodland bird communities. We asked: (1) How is the bird community associated with the vegetation structure of woodland patches and the amount of vegetation cover in the surrounding landscape? (2) Do species of conservation concern respond to woodland vegetation structure and surrounding vegetation cover differently to other species in the community? And (3) Can the relationships between the bird community and the woodland vegetation structure and surrounding vegetation cover be explained by the ecological traits of the species comprising the bird community? We studied 103 woodland patches (0.5 - 53.8 ha) over two time periods across a large (6,800 km<sup>2</sup>) agricultural region in southeastern Australia. We found that both patch vegetation and surrounding woody vegetation cover were important for structuring the bird community, and that these relationships were consistent over time. In particular, the occurrence of mistletoe within the patches and high values of woody vegetation cover within 1,000 ha and 10,000 ha were important, especially for bird species of conservation concern. We found that the majority of these species displayed similar, positive responses to patch and landscape vegetation attributes. We also found that these relationships were related to the foraging and nesting traits of the bird community. Our findings suggest that management strategies to increase both remnant vegetation quality and the cover of surrounding woody vegetation in fragmented agricultural landscapes may lead to improved conservation of bird communities.

**Citation:** Ikin K, Barton PS, Stirnemann IA, Stein JR, Michael D, et al. (2014) Multi-Scale Associations between Vegetation Cover and Woodland Bird Communities across a Large Agricultural Region. PLoS ONE 9(5): e97029. doi:10.1371/journal.pone.0097029

**Editor:** Francisco Moreira, Institute of Agronomy, University of Lisbon, Portugal

**Received:** February 8, 2014; **Accepted:** April 14, 2014; **Published:** May 15, 2014

**Copyright:** © 2014 Ikin et al. This is an open-access article distributed under the terms of the Creative Commons Attribution License, which permits unrestricted use, distribution, and reproduction in any medium, provided the original author and source are credited.

**Funding:** The authors thank the Australian Research Council, the Murray Catchment Management Authority and the Caring for Our Country Program for funding for this project. The funders had no role in study design, data collection and analysis, decision to publish, or preparation of the manuscript.

**Competing Interests:** The authors have declared that no competing interests exist.

\* E-mail: karen.ikin@anu.edu.au

## Introduction

Agricultural landscapes worldwide share a common history of native vegetation modification due to intensive land use, including tropical forests of Brazil [1], sagebrush-steppe landscapes of northwest America [2], semi-natural grasslands of northern Europe [3], and temperate eucalypt-dominated woodlands of Australia [4]. Within such landscapes, the intensification and expansion of agriculture has led to widespread loss and fragmentation of native vegetation [5]. Native vegetation patches provide key habitat resources for many species, including those of conservation concern, helping these species to persist in fragmented agricultural landscapes. For example, previous studies have found that remnant native vegetation was crucial for mammals in southern Spain [6] and the western Great Plains of North America [7], declining birds in the United Kingdom [8], The Netherlands [9] and Australia [10,11], and ant communities in Brazil [12]. It is therefore important to better understand the factors affecting

biodiversity in native vegetation patches to inform conservation strategies in agricultural landscapes.

It is well documented that both patch and landscape vegetation cover and structure are important for woodland birds in agricultural landscapes [13–16]. Such previous research has focused predominantly on *species-specific* responses (e.g. individual species occupancy) or effects on *species diversity* (richness and abundance). How patch and landscape-scale vegetation affects bird *community composition* is comparatively less well-understood [17,18]. Recent studies suggest that bird communities are influenced by vegetation at both the patch and landscape scale [10,18–20], consistent with species-specific and species diversity investigations. There have been mixed findings, however, regarding the differing effects of vegetation at these scales on community composition [10,18] and the stability of responses over time and space [17]. More community-level studies from different agricultural regions worldwide are needed to identify if these seemingly idiosyncratic findings can be integrated into global generalities [21]. Further, from a conservation perspective, community-level

studies need to build on those of single species and species diversity within the same agricultural region, to integrate policy and management recommendations.

We investigated how woodland bird communities were associated with patch and landscape scale vegetation across a large agricultural region. Our South-West Slopes Restoration Study is a spatially-extensive investigation in the ‘wheat-sheep belt’ of eastern Australia [22]. Across a region of approximately 6,800 km<sup>2</sup>, we have established 103 sites in woodland patches with varying amounts of woody vegetation cover in the surrounding landscape (Fig. 1). These sites were surveyed for birds and vegetation in 2002 and again in 2008. Montague-Drake et al. [11] found that the probability of detecting 13 bird species of conservation concern within these sites was related to a combination of patch-scale and landscape-scale vegetation cover and structure. Cunningham et al. [23] went on to establish that total bird species richness and the richness of bird species of conservation concern was related to native vegetation cover at multiple spatial scales in the surrounding landscape and over time. In a related study, Cunningham et al. [24] showed that individual species differed in their relationship with vegetation cover between spatial scales, and also to temporal changes in vegetation cover. These studies, however, did not consider the effect of multi-scale vegetation cover on the bird community from the perspective of community composition. The goal of our paper was to address this knowledge gap, and to this end, we investigated the following three key questions.

1. How is the bird community associated with the vegetation structure of woodland patches and the amount of vegetation cover in the surrounding landscape? We investigated patch-scale vegetation attributes known to be important for woodland bird occurrence [11]. These included habitat structures present in the ground-layer (grasses, leaf litter, moss and lichen), mid-layer (mid-sized trees, mid-storey cover) and canopy-layer (hollow-bearing trees, canopy depth) strata, as well as attributes capturing vegetation condition (tree dieback, mistletoe). We also investigated surrounding woody vegetation cover in the landscape at three scales of measurement known to be important for woodland bird richness and occurrence: 100 ha, 1,000 ha, and 10,000 ha [23,24]. Our aim was to identify the relationships between multi-scale vegetation cover and bird community structure, and also to see if this relationship was consistent over time. To do so, we compared data from 2002 and 2008.
2. Do species of conservation concern respond to woodland vegetation structure and surrounding vegetation cover differently to other species in the community? Southeastern Australia supports a suite of woodland-dependent bird species that several authors have identified as being of conservation concern, due to declining abundance and occurrence and/or listing in national and state-level threatened species legislation, for example the *Environment Protection and Biodiversity Conservation Act 1999*. These species have been adversely affected by ongoing vegetation loss, fragmentation and degradation (reviewed by [25], but see [26,27]). Some authors have suggested that species of conservation concern share similar life history attributes [28,29], and can be distinguished from other species in the assemblage. For example, many woodland bird species considered to be in decline are ground-foraging insectivores [25,30]. Other authors, however, have not identified clear relationships between long-term trends and life history attributes [26,31]. For instance, Mac Nally et al. [32] found similar effects of long-term drought on all foraging, nesting and movement guilds. In our study, we investigated

how species of conservation concern were associated with vegetation cover at multiple scales of measurement, and whether they could be grouped by their responses.

3. Can the relationships between the bird community and the woodland vegetation structure and surrounding vegetation cover be explained by the ecological traits of the species comprising the bird community? The occurrence of individual species at a given location is underpinned, in part, by their life history traits and how these traits dictate their resource requirements [33–36]. The community composition of a woodland patch, therefore, should reflect the relationship between the ecological traits (i.e. foraging methods and nesting strategies) of the species set and the woodland vegetation and surrounding vegetation cover. Thus, to deepen our understanding of the mechanisms by which the bird community is associated with woodland vegetation and surrounding vegetation [37,38], we investigated the underlying relationships between individual species traits and patch and landscape vegetation cover. Further, by comparing these relationships between 2002 and 2008, we were able to determine if these relationships were consistent through time.

Answering these three questions will provide better understanding about what patch and landscape vegetation attributes in agricultural landscapes are most important for birds at the community-level, including species of conservation concern. This will lead to improved understanding of how to target management strategies in fragmented agricultural landscapes to improve conservation of woodland bird communities.

## Methods

### Ethics Statement

This field study was undertaken with animal ethics approval obtained through The Australian National University Animal Experimentation Ethics Committee. The study was conducted on privately-owned land and access permission was granted by landowners prior to establishing the field sites.

### Study Area

We conducted our study in the South-West Slopes bioregion of New South Wales, in southeastern Australia [22]. Native vegetation within the region is predominantly temperate eucalypt woodland, with approximately 15% of original vegetation cover remaining [39]. For this study, we focused on 103 woodland patches located on 35 farms within the region (Fig. 1). The patches included old growth (n = 59) and regrowth (n = 44) woodland, and ranged in area from 0.5 ha to 53.8 ha (mean 9.3 ha). All were located in mixed cropping/grazing landscapes. We established a permanent field site in the centre of each patch in 2002; these were separated by a minimum distance of 120 m (average 800 m). A site consisted of a 200 m transect with three survey points, located at the 0 m, 100 m and 200 m distances. We surveyed the birds and vegetation at each site in 2002 and 2008 (see below). During this time, southeastern Australia experienced the most severe drought recorded since 1900. The ‘‘Millennium Drought’’ spanned the period 2001–2009 [40], representing an unprecedented number of sequential years with below-median rainfall. The effects of this drought included a 45% reduction in stream flow [40] and increased tree mortality in dryland ecosystems [41].

### Woodland Patch Vegetation

We identified 11 attributes that are each important determinants of site occupancy for at least three woodland birds of

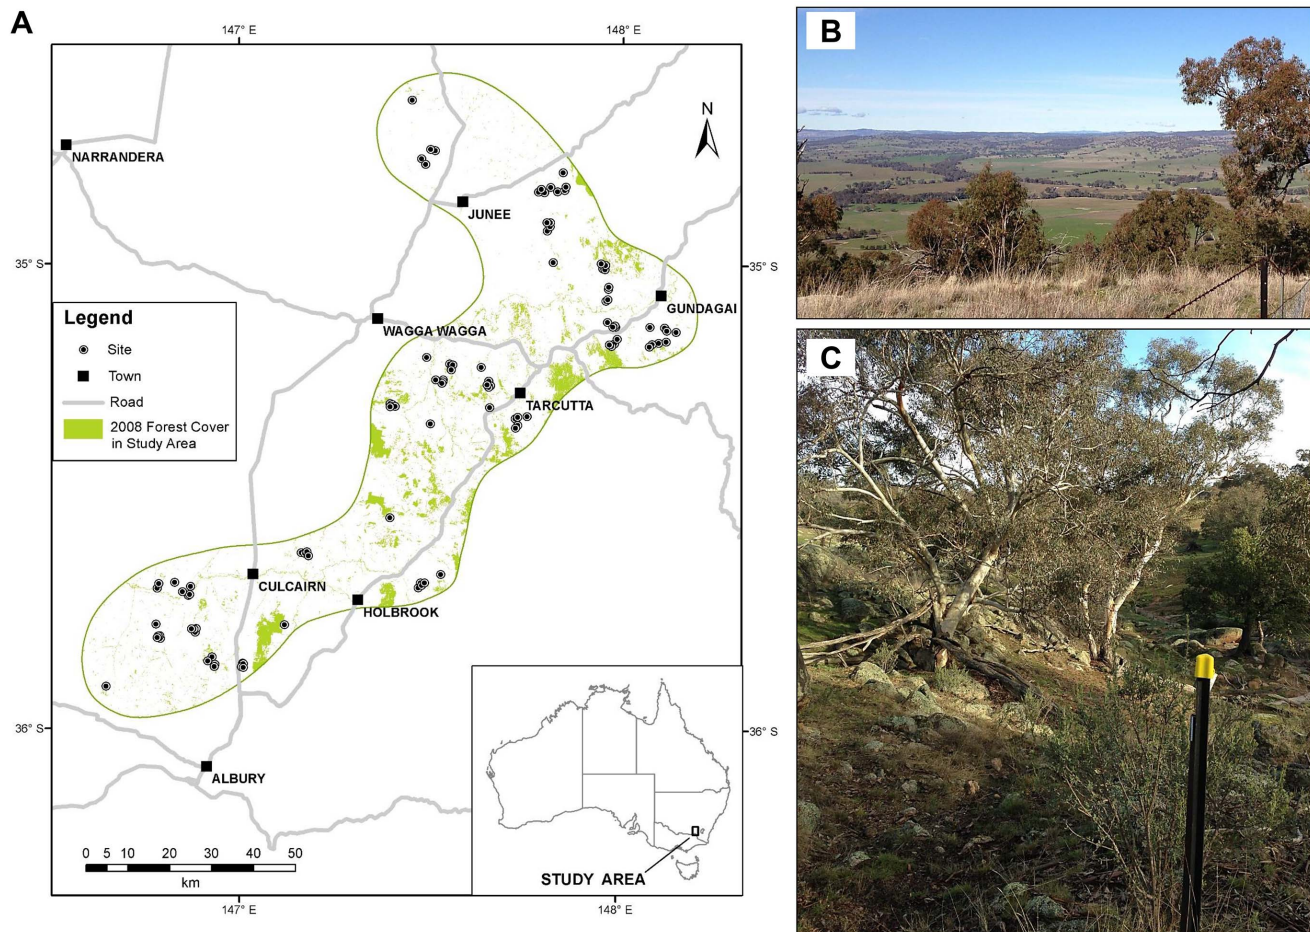

**Figure 1. The South-West Slopes Restoration Study, New South Wales, Australia: (A) location of woodland sites across the region [note that site points are not drawn to scale], (B) native vegetation cover in the surrounding landscape, and (C) a survey site in a woodland patch.** Images: K. Ikin.

doi:10.1371/journal.pone.0097029.g001

conservation concern (Table 1; [11]), and measured these variables in each woodland site in 2002 and again in 2008. We established three 20×20 m vegetation plots per transect, centred at the 0, 100 and 200 m transect survey points. Within these, we counted the number of trees with mid-sized stems (15–30 cm diameter at breast height) and the number of trees with hollows (cavities) visible from the ground. We adjusted these values to the number of trees per hectare. We measured the depth of the canopy (length of canopy from the base of the crown to the tree tip) of the tallest tree and scored the level of tree dieback (ranging from no dieback to tree death). At the corners of each plot, we established four 1×1 m sub-plots (12 sub-plots per transect). Within these, we visually estimated the percent cover of leaf litter, annual grasses and native grasses. We then calculated site averages for each of these plot and sub-plot variables. Lastly, we recorded the presence of mistletoe (*Amyma miquelii* and *A. pendula*) and midstorey cover in the plots and the presence of moss and lichen in the subplots. We used paired t-tests to test for significant differences in each of the vegetation variables between 2002 and 2008 (all analyses were conducted using 'R', version 3.0.2, <http://www.r-project.org/>, unless otherwise specified). To account for the multiple tests, we used the Bonferroni correction, and considered differences to be significant when  $P \leq 0.003$ .

We used Spearman's Rank Correlation Coefficients to check for strong positive ( $r_s \geq 0.5$ ) or negative ( $r_s \leq -0.5$ ) correlations between the vegetation variables in three datasets: (1) 2002 and 2008 combined, (2) 2002 only, and (3) 2008 only. Where variables were correlated, we retained only one of them for the subsequent analyses. In the 2002 and 2008 combined dataset, we retained canopy depth, number of mid-sized trees and hollow-bearing trees, dieback score, leaf litter and native grass cover, and presence of mistletoe, midstorey cover, and moss and lichen. In the 2002 dataset, we retained canopy depth, number of mid-sized trees, hollow-bearing trees and strata, dieback score, leaf litter and native grass cover, and presence of mistletoe, and moss and lichen. In the 2008 dataset, we retained canopy depth, number of mid-sized trees, hollow-bearing trees and strata, dieback score, leaf litter and native grass cover, and presence of mistletoe and midstorey cover.

### Surrounding Woody Vegetation

We measured woody vegetation cover surrounding our 103 woodland sites in 2002 and 2008 at three scales of measurement of increasing orders of magnitude: 100 ha, 1,000 ha, and 10,000 ha (Table 1). Previous research within the study region has shown that bird species richness is related to vegetation cover at each of these scales [23]. To measure vegetation cover in each year, we used grids of Forest Extent (FE) derived from Landsat TM and

**Table 1.** Summary of woodland patch vegetation and percent woody vegetation cover variables for 2002 and 2008.

| Variable                                | Description                                                                                                                              | 2002 Range (mean)                   | 2008 Range (mean)                   | P-Value |
|-----------------------------------------|------------------------------------------------------------------------------------------------------------------------------------------|-------------------------------------|-------------------------------------|---------|
| Mid-size trees                          | Number of trees with DBH 15–30 cm, adjusted to per ha                                                                                    | 0.00–12.67 (2.69)                   | 0.00–23.67 (2.63)                   | 0.604   |
| Canopy depth                            | Depth of the canopy of the tallest tree                                                                                                  | 3.00–20.00 (10.92)                  | 5.67–24.00 (13.8)                   | <0.001  |
| Hollow-bearing trees                    | Number of trees with visible hollows in/overhanging plots, adjusted to per ha                                                            | 0.00–108.3 (25.93)                  | 0.00–91.67 (16.99)                  | <0.001  |
| Dieback score                           | Amount of tree dieback. Scores are 0 = no dieback, 1 = branch tips dead, 2 = extensive defoliation, 3 = epicormic growth, 4 = tree death | 0.00–3.33 (1.20)                    | 0.00–4.00 (1.74)                    | <0.001  |
| Mistletoe                               | Presence of mistletoe                                                                                                                    | Present: 23 sites, Absent: 80 sites | Present: 18 sites, Absent: 85 sites | 0.132   |
| Midstorey cover                         | Presence of midstorey cover                                                                                                              | Present: 54 sites, Absent: 49 sites | Present: 9 sites, Absent: 94 sites  | <0.001  |
| Strata                                  | Number of strata                                                                                                                         | 2.00–4.00 (2.86)                    | 1.33–4.00 (2.39)                    | <0.001  |
| Annual grasses                          | Percent annual grasses cover                                                                                                             | 0.00–85.00 (25.98)                  | 0.00–80.83 (27.41)                  | 0.307   |
| Leaf litter                             | Percent leaf litter cover                                                                                                                | 0.42–81.67 (30.35)                  | 0.42–77.5 (31.49)                   | 0.474   |
| Native grasses                          | Percent native grasses cover                                                                                                             | 0.00–34.17 (8.46)                   | 0.00–62.08 (11.16)                  | 0.056   |
| Moss and lichen                         | Presence of moss and/or lichen cover                                                                                                     | Present: 61 sites, Absent: 42 sites | Present: 59 sites, Absent: 44 sites | 0.747   |
| Woody vegetation cover, 100 ha scale    | Percent woody vegetation cover within 100 ha                                                                                             | 0.00–43.86 (3.61)                   | 0.00–44.21 (4.66)                   | <0.001  |
| Woody vegetation cover, 1,000 ha scale  | Percent woody vegetation cover within 1,000 ha                                                                                           | 0.00–37.48 (3.75)                   | 0.03–37.91 (4.37)                   | <0.001  |
| Woody vegetation cover, 10,000 ha scale | Percent woody vegetation cover within 10,000 ha                                                                                          | 0.05–23.77 (5.38)                   | 0.09–24.79 (6.19)                   | <0.001  |

Paired t-tests were used to test for significant differences ( $P \leq 0.003$ ) between the two study years.  
doi:10.1371/journal.pone.0097029.t001

MSS satellite imagery from 2002 and 2008 (see [42] for a detailed description of the satellite imagery specifications). Grid cells (25 m × 25 m resolution) with a minimum canopy cover of 20% over a minimum area of 0.2 ha with a potential height of  $\geq 2$  m were characterised as woody vegetation; this classification included old-growth, regrowth and replanted vegetation. We then determined the number of grid cells with woody vegetation at each scale to calculate the percent woody vegetation cover.

In each of the three datasets (2002 and 2008 combined, 2002 only, and 2008 only), percent woody vegetation cover in the 100 ha and 1,000 ha scales were positively correlated, as were the 1,000 ha and 10,000 ha scales. To reduce this collinearity, we calculated new 100 ha and 1,000 ha woody vegetation cover variables. We did this by subtracting from the value of the smaller scale the value of the larger scale it was nested within, following the method of Rhodes et al. [43]:

- New 100 ha percent woody vegetation cover = original 100 ha percent cover – original 1,000 ha percent cover
- New 1,000 ha percent woody vegetation cover = original 1,000 ha percent cover – original 10,000 ha percent cover.

Thus, the recalculated percent woody vegetation cover variables equalled the difference between the original variable and the value of the larger scale that it is nested within, whilst the value of the 10,000 ha percent woody vegetation cover remained the same. We used Spearman's Rank Correlation Coefficients to confirm that our new variables were not correlated. We used paired t-tests to test for significant differences ( $P \leq 0.003$ , Bonferroni correction) in each of the percent woody vegetation cover variables between 2002 and 2008.

## Birds

We surveyed each site for birds in the austral spring of 2002 and again in spring 2008. These surveys were completed in early November, which is the peak breeding season in the study region when most birds, including summer migrants, establish breeding territories and therefore exhibit high site fidelity [11]. In each year, we surveyed each survey point twice, totalling six surveys per site (three survey points per transect by two repeats). For each survey, observers stood at the survey point for five minutes and recorded as present all birds observed within 50 m of the point (excluding birds flying overhead). At the completion of the survey, the observer would move to the next survey point; once all points in the site were surveyed, the observer would move to a different site. Repeat surveys were undertaken by a different observer on a different day. This survey protocol of multiple observers and repeat visits overcomes observer heterogeneity effects [44] and helps to correct for false-negative errors, i.e. failure to detect a species that is present at the site [45]. All surveys were completed within four hours of first light.

We assessed the thoroughness of our bird surveys to ensure appropriate interpretation of our results [46]. To do this, we used multiple richness estimators to calculate separate total bird species richness estimates for 2002 and 2008 (EstimateS 9 [47]). We then compared the observed numbers of species with the estimated number of species. To avoid possible bias introduced by cryptic or wide-ranging species that were not detected in our surveys, we excluded waterbirds and species recorded at only one site from subsequent analyses.

**Bird community composition (Questions 1 and 2).** We used a two-step process to analyse how the bird community was associated with woodland patch vegetation and surrounding



woody vegetation in 2002 and 2008 combined, 2002 only and 2008 only. First, we determined whether there was structure in the bird community, i.e. whether the bird species could be characterised by the woodland patches where they occurred and whether the patches could be characterised by the species they supported. To do this, we used correspondence analysis [48] using a matrix of reporting rates for each species at each site. We defined reporting rate as the number of survey points out of six (three survey points  $\times$  two repeats) that each species was observed. The correspondence analysis thus characterised the bird community structure at each woodland patch by the identity of the bird species as well as the number of times each species was observed. Second, we related the bird community structure to the woodland vegetation and surrounding woody vegetation variables and the size of the woodland patch. To do this, we employed canonical correspondence analysis [49]. We started with the full ordination model that included all variables; these were scaled and log-transformed prior to inclusion in the model. We then used permutation tests, with a maximum of 1000 permutations, to test the significance of the marginal effects of the individual variables. We successively removed least-significant variables until all variables remaining in the model were significant ( $P \leq 0.05$ ). We then tested the significance of the first two axes of the ordination ( $P \leq 0.05$ ). We plotted the relationship between individual bird species and the vegetation variables in the final model for 2002 and 2008 combined, 2002 only and 2008 only, and identified species of conservation concern (sensu [11]; Table 1).

**Bird species traits (Question 3).** We assigned a foraging method and nest site trait to each species (Table 2, Table S1 [50]). We used RLQ analysis [51] to explore the underlying relationships between these ecological traits and the woodland vegetation and surrounding woody vegetation variables. For 2002 and 2008 combined, 2002 only, and 2008 only, we used the woodland vegetation and surrounding woody vegetation variables identified in the final canonical correspondence analysis models (see above). We plotted the ordination and grouped species traits by their relationship with the vegetation variables.

## Results

We found that several of the vegetation variables differed significantly between 2002 and 2008. The amount of tree dieback in the woodland patches increased significantly between these two periods, as did the canopy depth (Table 1; Fig. S1). The number of strata and the midstorey cover occurrence decreased significantly. The other woodland vegetation attributes did not significantly differ between the two years. In the surrounding landscape, percent woody vegetation cover increased significantly at all three scales of measurement (Table 1). This increase primarily reflects growth of vegetation within existing revegetation plantings and woodland patches to the 20% minimum canopy cover, 0.2 ha area and 2 m height thresholds to be classified as vegetation cover in 2008 compared with 2002.

We recorded 92 species of birds in 2002 and 2008, excluding waterbirds (Table S1). Our surveys showed a very high level of thoroughness, with the number of species observed ranging between 90.12% and 99.91% of estimated richness (Table S2). We recorded 87 species at  $\geq 2$  sites in 2002 and 2008 combined, 70 species at  $\geq 2$  sites in 2002, and 80 species at  $\geq 2$  sites in 2008. Of the 17 species of conservation concern observed during the study period (Table S1, Fig. S2), 16 were recorded at  $\geq 2$  sites in one or both years (Table 2). The Speckled Warbler (*Chthonicola sagittata*) was recorded at only one site in 2002 and 2008 and was excluded from analysis.

### Bird Community Composition (Questions 1 and 2)

We found strong structure in the bird community in 2002 and 2008 combined (first canonical correlation: 0.67), 2002 only (first canonical correlation: 0.69) and 2008 only (first canonical correlation: 0.67). Bird community structure could be explained by a combination of woodland vegetation and landscape context (Table 3). These drivers differed slightly between 2002, 2008 and both years combined, but there was overall consistency in how they shaped the bird community.

**Table 2.** Species of conservation concern (listed as a declining woodland species by Watson [30] and/or listed in national and state-level threatened species legislation).

| Code  | Name                     | Scientific Name                   | Foraging Method         | Nest Site      |
|-------|--------------------------|-----------------------------------|-------------------------|----------------|
| BCH   | Black-chinned Honeyeater | <i>Melithreptus gularis</i>       | Foliage Search          | Foliage        |
| BTr   | Brown Treecreeper        | <i>Climacteris picumnus</i>       | Wood Search             | Hollow         |
| CST   | Crested Shrike-tit       | <i>Falculunculus frontatus</i>    | Wood Search             | Fork or Branch |
| DF    | Diamond Firetail         | <i>Stagonopleura guttata</i>      | Granivore               | Foliage        |
| DW    | Dusky Woodswallow        | <i>Artamus cyanopterus</i>        | Hawk/Sally              | Fork or Branch |
| EYR   | Eastern Yellow Robin     | <i>Eopsaltria australis</i>       | Pounce                  | Fork or Branch |
| GCB   | Grey-crowned Babbler     | <i>Pomatostomus temporalis</i>    | Ground Carnivore/Forage | Foliage        |
| HR    | Hooded Robin             | <i>Melanodryas cucullata</i>      | Pounce                  | Fork or Branch |
| JW    | Jacky Winter             | <i>Microeca fascinans</i>         | Hawk/Sally              | Fork or Branch |
| RCR   | Red-capped Robin         | <i>Petroica goodenovii</i>        | Pounce                  | Fork or Branch |
| ReF   | Restless Flycatcher      | <i>Myiagra inquieta</i>           | Hawk/Sally              | Fork or Branch |
| RuW   | Rufous Whistler          | <i>Pachycephala rufiventris</i>   | Wood Search             | Foliage        |
| SoW   | Southern Whiteface       | <i>Aphelocephala leucopsis</i>    | Ground Carnivore/Forage | Hollow         |
| SuP   | Superb Parrot            | <i>Polytelis swainsonii</i>       | Granivore               | Hollow         |
| WBB   | White-browed Babbler     | <i>Pomatostomus superciliosus</i> | Ground Carnivore/Forage | Foliage        |
| WBroW | White-browed Woodswallow | <i>Artamus superciliosus</i>      | Hawk/Sally              | Fork or Branch |

doi:10.1371/journal.pone.0097029.t002

**Table 3.** Canonical correspondence analysis results for the final model for 2002 and 2008 combined, 2002 only and 2008 only.

| Year                   | Final model                       | Df     | $\chi^2$ | F    | Pr(>F) | Eig.  | Prop. |      |
|------------------------|-----------------------------------|--------|----------|------|--------|-------|-------|------|
| 2002 and 2008 combined | Variables                         |        |          |      |        |       |       |      |
|                        | Leaf litter                       | 1      | 0.03     | 1.51 | 0.032  |       |       |      |
|                        | Canopy depth                      | 1      | 0.03     | 1.50 | 0.032  |       |       |      |
|                        | Hollow-bearing trees              | 1      | 0.03     | 1.50 | 0.036  |       |       |      |
|                        | Mistletoe occurrence              | 1      | 0.06     | 2.53 | 0.001  |       |       |      |
|                        | Patch size                        | 1      | 0.04     | 1.96 | 0.002  |       |       |      |
|                        | Woody vegetation cover, 100 ha    | 1      | 0.04     | 1.81 | 0.010  |       |       |      |
|                        | Woody vegetation cover, 1,000 ha  | 1      | 0.06     | 2.76 | 0.001  |       |       |      |
|                        | Woody vegetation cover, 10,000 ha | 1      | 0.12     | 5.23 | 0.001  |       |       |      |
|                        | Year                              | 1      | 0.05     | 2.21 | 0.003  |       |       |      |
| Axes                   | Axis 1                            | 1      | 0.20     | 8.83 | 0.001  | 0.20  | 0.39  |      |
|                        | Axis 2                            | 1      | 0.07     | 2.99 | 0.001  | 0.07  | 0.13  |      |
| 2002 only              | Variables                         |        |          |      |        |       |       |      |
|                        | Dieback score                     | 1      | 0.06     | 1.59 | 0.040  |       |       |      |
|                        | Mistletoe occurrence              | 1      | 0.09     | 2.30 | 0.001  |       |       |      |
|                        | Woody vegetation cover, 1,000 ha  | 1      | 0.09     | 2.42 | 0.002  |       |       |      |
|                        | Woody vegetation cover, 10,000 ha | 1      | 0.14     | 3.64 | 0.001  |       |       |      |
|                        | Axis 1                            | 1      | 0.22     | 5.83 | 0.001  | 0.22  | 0.58  |      |
| Axes                   | Axis 2                            | 1      | 0.07     | 1.86 | 0.016  | 0.07  | 0.18  |      |
|                        | Leaf litter                       | 1      | 0.06     | 1.69 | 0.010  |       |       |      |
| 2008 only              | Variables                         |        |          |      |        |       |       |      |
|                        | Mistletoe occurrence              | 1      | 0.08     | 2.13 | 0.002  |       |       |      |
|                        | Patch size                        | 1      | 0.07     | 1.89 | 0.004  |       |       |      |
|                        | Woody vegetation cover, 100 ha    | 1      | 0.06     | 1.65 | 0.026  |       |       |      |
|                        | Woody vegetation cover, 1,000 ha  | 1      | 0.08     | 2.09 | 0.001  |       |       |      |
|                        | Woody vegetation cover, 10,000 ha | 1      | 0.13     | 3.40 | 0.001  |       |       |      |
|                        | Axis 1                            | 1      | 0.20     | 5.32 | 0.001  | 0.20  | 0.41  |      |
|                        | Axes                              | Axis 2 | 1        | 0.09 | 2.34   | 0.001 | 0.09  | 0.18 |

Variables: All variables in each model had significant marginal effects. Axes: The first two axes in each model were significant, and the eigenvalues (Eig.) and proportion of variance explained (Prop.) are given.  
doi:10.1371/journal.pone.0097029.t003

In 2002 and 2008 combined, we found that woodland patch leaf litter cover, canopy depth, hollow bearing tree density, mistletoe occurrence, patch size, and surrounding woody vegetation cover at all three scales (100 ha, 1,000 ha and 10,000 ha) significantly affected community composition (Fig. 2A, Table 3). Community composition also was significantly different between years. Axis 1 explained 39% of variation and arranged sites from those with trees with large canopies and high numbers of hollow bearing trees to those sites within larger patches with high leaf litter cover, mistletoe occurrence and high woody vegetation cover at the 10,000 ha scale. All species of conservation concern were positively associated with this axis, with the exception of the Superb Parrot (see Table 2 for scientific names), which was positively associated with canopy depth (Fig. 2D). Axis 2 explained 15% of variance and arranged sites from those with high woody vegetation cover at the 10,000 ha scale to those with high woody vegetation cover at the 100 ha and 1,000 ha scales. Species of conservation concern were associated with both scales of vegetation cover. In particular, the Grey-crowned Babbler was associated with woody vegetation cover at the 1,000 ha scale. Axis 2 also differentiated the bird community between 2002 and 2008; however no species, including those of conservation concern, were strongly associated with either year.

In 2002, we found that woodland patch dieback, mistletoe occurrence, and surrounding woody vegetation cover at the 1,000 ha and 10,000 ha scales significantly affected community

composition (Fig. 2B, Table 3). Axis 1 explained 58% of variation and arranged sites from those with high dieback scores to those with mistletoe and high woody vegetation cover at the 10,000 ha scale. All species of conservation concern were positively associated with this axis, with the exception of the Superb Parrot (Fig. 2E). In particular, the Hooded Robin appeared to be positively associated with mistletoe and the Jacky Winter with woody vegetation cover at the 10,000 ha scale. Axis 2 explained 18% of variance and arranged sites from those with high woody vegetation cover at the 10,000 ha scale to those with high woody vegetation cover at the 1,000 ha scale. Species of conservation concern were associated with both scales of cover.

In 2008, we found that woodland patch leaf litter cover, mistletoe occurrence, patch size, and surrounding woody vegetation cover at all three scales (100 ha, 1,000 ha and 10,000 ha) significantly affected community composition (Fig. 2C, Table 3). Axis 1 explained 41% of variance and arranged sites along a gradient of increasing patch size, mistletoe occurrence, leaf litter cover and woody vegetation cover at the 10,000 ha scale. Similar to 2002, all species of conservation concern, with the exception of the Superb Parrot, were positively associated with this axis (Fig. 2F). Axis 2 explained 18% of variance and arranged sites along a gradient of increasing leaf litter cover and woody vegetation cover at the 100 ha and 1,000 ha scales. Again, species of conservation concern were associated with all scales of surrounding woody vegetation cover.

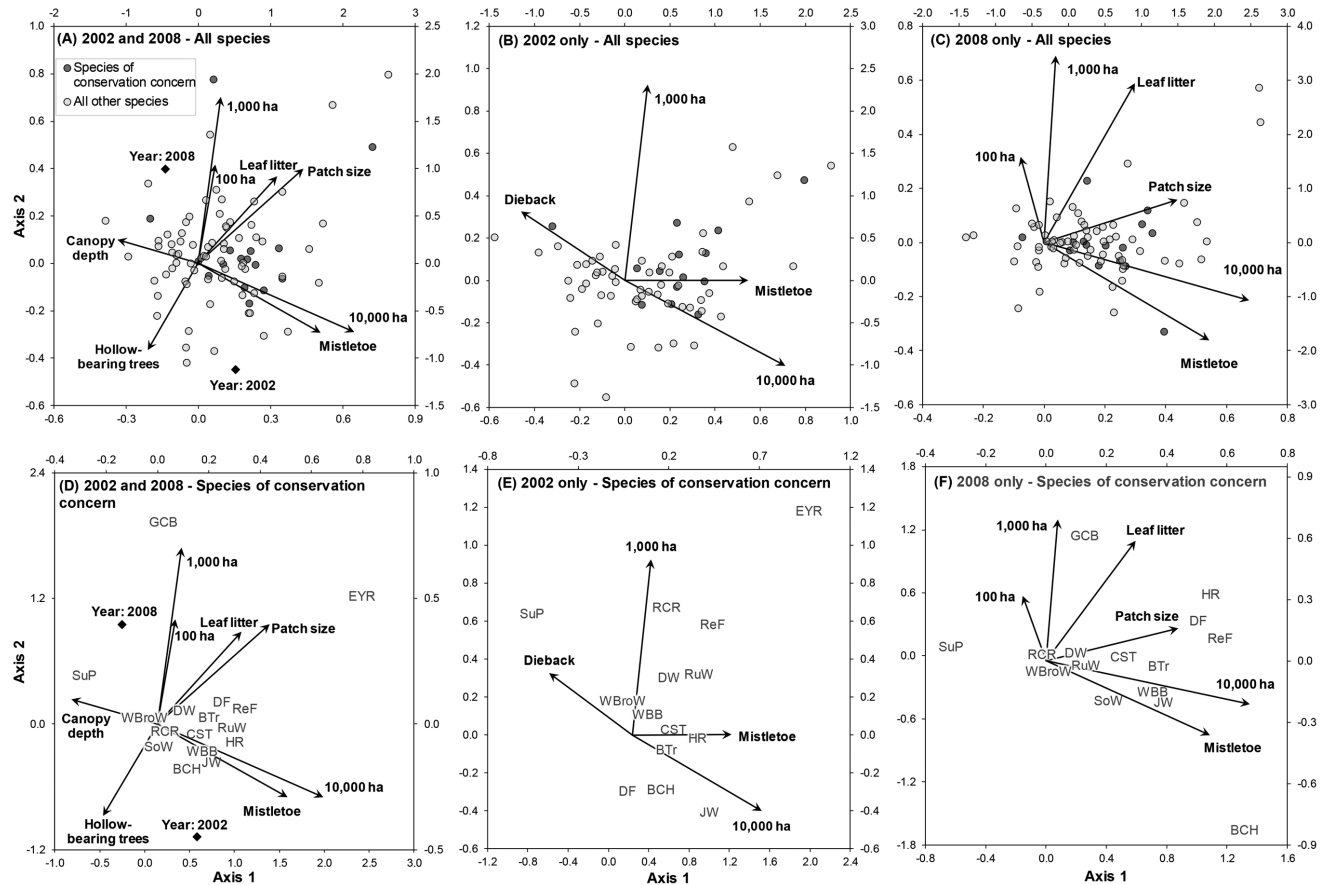

**Figure 2. Ordinations of the final canonical correspondence analysis models showing relationship between bird species and woodland patch vegetation and surrounding woody vegetation variables.** All species plotted, with species of conservation concern identified: (A) both years combined, (B) 2002, and (C) 2008. Only species of conservation concern plotted: (D) both years combined, (E) 2002, and (F) 2008. See Table S1 for full list of species included in the analyses. See Table 2 for species codes. doi:10.1371/journal.pone.0097029.g002





**Table 4. Results of RLQ analyses of the vegetation cover within and surrounding each woodland patch (R), the species present (L), and their life-history traits (Q) for 2002 and 2008 combined, 2002 only and 2008 only.**

|                       | 2002 and 2008 combined |              | 2002         |              | 2008         |              |
|-----------------------|------------------------|--------------|--------------|--------------|--------------|--------------|
|                       | Axis 1 (%)             | Axis 2 (%)   | Axis 1 (%)   | Axis 2 (%)   | Axis 1 (%)   | Axis 2 (%)   |
| Separate ordinations  |                        |              |              |              |              |              |
| R(PCA)                | 1.80 (19.98)           | 1.55 (17.26) | 1.46 (36.39) | 1.04 (25.97) | 1.75 (29.23) | 1.37 (22.91) |
| L(CA)                 | 0.45 (9.36)            | 0.26 (5.45)  | 0.48 (11.64) | 0.34 (8.34)  | 0.45 (11.12) | 0.23 (5.64)  |
| Q(PCA)                | 1.80 (12.87)           | 1.70 (12.15) | 1.89 (10.48) | 1.80 (9.98)  | 1.79 (12.80) | 1.71 (12.18) |
| RLQ axis eigenvalues  | 0.10 (57.28)           | 0.03 (16.75) | 0.16 (81.59) | 0.02 (10.19) | 0.07 (53.56) | 0.04 (29.19) |
| Covariance            | 0.32                   | 0.17         | 0.40         | 0.14         | 0.26         | 0.19         |
| Correlation: L        | 0.23 (34.49)           | 0.14 (26.87) | 0.32 (46.77) | 0.13 (21.36) | 0.21 (31.87) | 0.15 (31.44) |
| Projected variance: R | 1.43 (79.38)           | 2.92 (87.26) | 1.16 (79.96) | 2.23 (89.30) | 1.25 (71.56) | 2.80 (89.34) |
| Projected variance: Q | 1.32 (73.00)           | 2.35 (67.18) | 1.33 (70.72) | 2.55 (69.30) | 1.22 (68.33) | 2.33 (66.53) |

Separate ordinations: eigenvalues (and percent variance explained) for the first two axes from the ordinations of the R (Hill-Smith principal components analysis), L (correspondence analysis) and Q (Hill-Smith principal components analysis) tables. RLQ analysis: eigenvalues (and percent variance explained), covariance and correlation (and percent variance) with the correspondence analysis of the L matrix, and projected variance (and percent variance) with the R and Q matrices.

doi:10.1371/journal.pone.0097029.t004

exclusively or occasionally, in their diet. Our findings support those of Watson and Herring [59], who found that the experimental removal of mistletoe led to significant decreases in woodland dependent and resident bird species, with changes seen across the whole bird community.

The bird community was significantly associated with woodland patch size in 2008 and when considering both years combined. Patch size is considered a key correlate with species occupancy and diversity [60,61], with larger patches having higher occupancy and supporting more species. For example, Díaz et al. [62] found that patch size explained 67–75% of variation in bird species richness in pine plantations. Patch size, however, may be confounded with habitat loss and fragmentation [63], and the effect of patch size may be related to vegetation type [64] and matrix conditions [65]. Furthermore, a recent meta-analysis [66] found that patch size, whilst important, was a poor predictor of species occupancy. In our study, the bird community associated with patch size was similarly associated with patch and landscape-scale vegetation cover. Thus, we were unable to identify the independent importance of patch-size for structuring the bird community.

The period of our study coincided with the “Millennium Drought”, the most severe drought Australia has experienced since 1900 [40], and it is likely that this drought affected the bird community. Direct effects of drought on fauna include altered trophic relationships, range shifts and novel species associations (reviewed by [67–69]). Indirect effects include tree death and dieback [41] and disruptions to pollination [70]. Underlying some of these impacts is the reduction or change in the availability of habitat resources across space and in time. Critically, in landscapes where habitat resources have already been depleted due to other forms of landscape change (such as caused by agriculture) extreme climatic events can exacerbate pressures already experienced by species dependent on remnant vegetation, rendering them more sensitive to future change [32,67]. Further, inter-regional differences in fragmentation and climate may lead to some species increasing or decreasing in parts of their range [26], and subsequent shifts in community composition. Given the expected changes in climate and rainfall patterns in many parts of the world [71,72], the relative importance of remnant vegetation for supporting fauna may increase. From a conservation management perspective, it is crucial that we better understand what influences species occurrence and community composition within fragmented woodland vegetation during extreme climatic events. Our finding of consistent relationships between the bird community and patch and landscape-scale vegetation during the drought period suggests that management actions focused at these scales are likely to continue to be important under future climate scenarios.

### Bird Species Trait Associations with Patch and Landscape-scale Vegetation

Our work demonstrates how investigating underlying ecological traits gives greater insights into community patterns [37,38]. For instance, we found a clear separation between species that forage or nest in vegetation (e.g. shrub carnivores and branch nesters) and those that are able to use more open areas (e.g. sweep/air pursuit feeders and ground nesters). This indicates that the loss or gain of vegetation structure in woodland patches will have an impact upon specific components of the bird community. We found that species of conservation concern shared similar foraging and nesting traits, but represented several foraging and nesting guilds. This agrees with similar results from previous studies [26,32] and supports the maintenance of heterogeneous habitat containing diverse resource niches [31]. Several previous studies have

suggested that ground-foraging insectivores are in decline [25,30]. However, we did not find an association between ground-foraging and species of conservation concern. We note, however, that this guild included several ‘open country’ species, for example the Magpie Lark (*Grallina cyanoleuca*) and Australasian Pipit (*Anthus novaeseelandiae*), and their association with less structurally-dense vegetation may have influenced our findings.

## Management Implications

Similarities among bird species of conservation concern in their relationships to patch and landscape-scale vegetation cover suggest that management strategies aimed at individual species are likely to have wider benefits for other species. In the remainder of this paper, we discuss management strategies to increase woodland patch vegetation quality and the cover of surrounding woody vegetation in fragmented agricultural landscapes to achieve the improved conservation of woodland bird communities. We advise that these management strategies be implemented under an adaptive monitoring framework [73] to assess their outcomes.

**1. Woodland condition.** The presence of mistletoe in the woodland patches (irrespective of its abundance) was important for structuring the bird community, and associated with species of conservation concern. As such, we recommend that greater consideration be given to the maintenance and perpetuation of mistletoe in agricultural landscapes. Management may have to be undertaken indirectly, however, because mistletoe cannot be transplanted and inoculation is difficult to achieve [58]. Instead, management approaches aimed at increasing woodland condition may be more effective [74]: higher quality remnants may attract the bird species capable of dispersing mistletoe seeds and improved tree health will enable the deposited seeds to grow and mature.

**2. Structural diversity.** In contrast to other species of conservation concern, the Superb Parrot was associated with sites with large canopies and hollow-bearing trees, reflecting its distinct habitat preferences. Large, old living and dead trees provide hollows crucial for the Superb Parrot and other hollow-nesting species [75], and woodland patches with dense stands of smaller or younger trees do not provide equivalent resources. The Superb Parrot thus serves as a reminder that it is important to have structural diversity across woodland patches, i.e. “don’t have the same thing everywhere” [76].

**3. Regrowth vegetation.** We found that the cover of woody vegetation in the surrounding landscape was associated with bird community composition. Woodland patches supported more species of conservation concern when in landscapes with high woody vegetation cover at the 1,000 ha and 10,000 ha scales. Landscape-scale vegetation cover may buffer changes in patch-scale vegetation cover, and measures to increase native vegetation cover in agricultural landscapes are vital to improved conservation outcomes [77]. A potential focus for management interventions includes increasing/preserving stands of native regrowth, which provides habitat for a range of species [11,77], including many woodland birds. It is therefore important that regrowth receives sufficient formal protection. For example, in our study region, native vegetation that has regenerated since 1990 is classified as regrowth and is regulated by government legislation on tree clearing (Native Vegetation Act 2003). Proposed changes to this legislation, however, will allow ‘thinning’ of dense vegetation such as regrowth. This raises concerns for the structural integrity of regrowth and its associated benefits for woodland birds.

**4. Revegetation plantings.** Another widely applied management intervention to increase landscape vegetation cover in agricultural landscapes worldwide [78], and in southeastern Australia in particular [20], is to actively revegetate areas. This

approach provides important habitat for woodland birds, including many of conservation concern [56,79,80], and may be an important adaptation to climate change [81]. However, extreme climatic events, such as drought, can be detrimental to the success of restoration efforts [82], and it is critical that revegetation programs consider these potential impacts. One measure to improve the success of revegetation plantings is to choose plant species capable of establishing and surviving drought [81].

## Conclusions

Improving biodiversity conservation in fragmented agricultural landscapes has become an important global issue [83]. This is evident through the large investments in farmland biodiversity that are becoming increasingly common (e.g. agri-environmental schemes [84,85]). Missing from much of the ecological research underpinning these schemes, however, are investigations at the level of the community assemblage [17]. Addressing this knowledge gap improves our ability to generalise across agricultural landscapes, and leads to integrated multi-species conservation policies and management. Our investigation of multi-scale associations between vegetation cover and woodland bird communities shows that both patch-scale vegetation structure and landscape-scale vegetation cover are important determinants of community composition. This finding supports those from previous species-specific and species diversity research, and from different regions worldwide [13–15,86]. Further, species of conservation concern showed similar responses. This suggests that the species under most threat in agricultural landscapes will be positively affected by undertaking management actions to improve woodland condition and landscape vegetation cover.

## Supporting Information

**Figure S1 Mean values ( $\pm$  standard error) for remnant vegetation and surrounding woody vegetation variables in 2002 and 2008.** Paired t-tests were used to test for significant differences ( $P \leq 0.003$ ) between the two study years. (TIF)

**Figure S2 Some of the bird species of conservation concern analysed in this study.** Clockwise from top left: Pair of hooded robins, grey-crowned babbler, brown treecreeper, eastern yellow robin and immature red-capped robin. Scientific names are given in Table S1. Images by D. Stojanovic. (TIF)

**Table S1 Full list of 92 bird species recorded in study (excluding waterbirds), including species of conservation concern (declining woodland species and/or listed in national and state-level threatened species legislation).** In 2002 and 2008 combined, 92 species were recorded, of which five species were recorded at 1 site (~) and 87 were recorded at  $\geq 2$  sites (\*). In 2002, 83 species were recorded, of which 70 were recorded at  $\geq 2$  sites. In 2008, 86 species were recorded, of which 80 were recorded at  $\geq 2$  sites. Key to foraging method: F = foliage search, G = granivore, GCF = ground carnivore or forage, HS = hawk/sally, NP = nectar/pollen collection, P = pounce, SAP = sweep/air pursuit, SC = shrub carnivore, VM = various methods, and WBS = wood/bark search. Key to nest site: B = burrow, F = foliage, FB = fork or branch, G = ground, H = hollow, and O = opportunistic. (DOCX)

**Table S2 Summary of the number of observed bird species, and estimated species richness in 2002 and 2008.**

(DOCX)

**Acknowledgments**

We thank Rebecca Montague-Drake, Chris MacGregor, Lachlan McBurney and members of the Canberra Ornithologists Group for their

**References**

1. Ferraz KMPMDB, De Siqueira MF, Alexandrino ER, Da Luz DTA, Do Couto HTZ (2012) Environmental suitability of a highly fragmented and heterogeneous landscape for forest bird species in south-eastern Brazil. *Environ Conserv* 39: 316–324.
2. Hanser SE, Huntly NJ (2006) The biogeography of small mammals of fragmented sagebrush-steppe landscapes. *J Mammal* 87: 1165–1174.
3. Eriksson O, Cousins SAO, Bruun HH (2002) Land-use history and fragmentation of traditionally managed grasslands in Scandinavia. *Journal of Vegetation Science* 13: 743–748.
4. Hobbs RJ (2005) Landscapes, ecology and wildlife management in highly modified environments – an Australian perspective. *Wildl Res* 32: 389–398.
5. Lindenmayer D, Cunningham S, Young A, editors (2012) Land use intensification: Effects on agriculture, biodiversity and ecological processes. Collingwood VIC: CSIRO Publishing.
6. Pereira M, Rodriguez A (2010) Conservation value of linear woody remnants for two forest carnivores in a Mediterranean agricultural landscape. *J Appl Ecol* 47: 611–620.
7. Kamler JF, Ballard WB, Fish EB, Lemons PR, Mote K, et al. (2003) Habitat use, home ranges, and survival of swift foxes in a fragmented landscape: conservation implications. *J Mammal* 84: 989–995.
8. Fuller RJ, Smith K, Grice P, Currie F, Quine C (2007) Habitat change and woodland birds in Britain: implications for management and future research. *Ibis* 149 (Suppl. 2): 261–268.
9. Opdam P, Rijdsdijk G, Hustings F (1985) Bird communities in small woods in an agricultural landscape: effects of area and isolation. *Biol Conserv* 34: 333–352.
10. Johnson M, Reich P, Mac Nally R (2007) Bird assemblages of a fragmented agricultural landscape and the relative importance of vegetation structure and landscape pattern. *Wildl Res* 34: 185–193.
11. Montague-Drake R, Lindenmayer DB, Cunningham R (2009) Factors effecting site occupancy by woodland bird species of conservation concern. *Biol Conserv* 142: 2896–2903.
12. Pacheco R, Vasconcelos H, Groc S, Camacho G, Frizzo TM (2013) The importance of remnants of natural vegetation for maintaining ant diversity in Brazilian agricultural landscapes. *Biodivers Conserv* 22: 983–997.
13. Major RE, Christie FJ, Gowing G (2001) Influence of remnant and landscape attributes on Australian woodland bird communities. *Biol Conserv* 102: 47–66.
14. Radford JQ, Bennett AF, Cheers GJ (2005) Landscape-level thresholds of habitat cover for woodland-dependent birds. *Biol Conserv* 124: 317–337.
15. Mortelliti A, Fagiani S, Battisti C, Capizzi D, Boitani L (2010) Independent effects of habitat loss, habitat fragmentation and structural connectivity on forest-dependent birds. *Divers Distrib* 16: 941–951.
16. van Dorp D, Opdam PFM (1987) Effects of patch size, isolation and regional abundance on forest bird communities. *Landscape Ecol* 1: 59–73.
17. Bonthoux S, Barnagaud J-Y, Goulard M, Balent G (2013) Contrasting spatial and temporal responses of bird communities to landscape changes. *Oecologia* 172: 563–574.
18. Leyequien E, de Boer WF, Toledo VM (2010) Bird Community Composition in a Shaded Coffee Agro-ecological Matrix in Puebla, Mexico: The Effects of Landscape Heterogeneity at Multiple Spatial Scales. *Biotropica* 42: 236–245.
19. Pereira P, Godinho C, Gomes M, Rabaça J (2014) The importance of the surroundings: are bird communities of riparian galleries influenced by agroforestry matrices in SW Iberian Peninsula? *Ann For Sci* 71: 33–41.
20. Lindenmayer DB, Northrop-Mackie AR, Montague-Drake R, Crane M, Michael D, et al. (2012) Not all kinds of revegetation are created equal: Revegetation type influences bird assemblages in threatened Australian woodland ecosystems. *PLoS ONE* 7.
21. Watson DM (2014) On pluralism in ecology: seeing the forest and the trees. *Proc R Soc B*: DOI: 20132696.
22. Cunningham RB, Lindenmayer DB, Crane M, Michael D, MacGregor C (2007) Reptile and arboreal marsupial response to replanted vegetation in agricultural landscapes. *Ecol Appl* 17: 609–619.
23. Cunningham R, Lindenmayer DB, Michael D, Crane M, Barton PS, et al. (2014) The law of diminishing returns: woodland birds respond to native vegetation cover at multiple spatial and temporal scales *Divers Distrib* 20: 59–71.
24. Cunningham R, Lindenmayer D, Barton PS, Ikin K, Crane M, et al. (in press) Cross-sectional and temporal relationships between bird occupancy and vegetation cover at multiple spatial scales. *Ecol Appl*: Accepted 23 December 2013.

important contribution to the collection of the field data, and David Watson, Alessio Mortelliti, Laura Rayner and Dana Berens for valuable feedback on earlier versions of the manuscript.

**Author Contributions**

Conceived and designed the experiments: DBL DM MC SO. Performed the experiments: DBL DM MC SO. Analyzed the data: KI PSB JRS. Wrote the paper: KI PSB IAS DBL.

25. Ford HA (2011) The causes of decline of birds of eucalypt woodlands: advances in our knowledge over the last 10 years. *Emu* 111: 1–9.
26. Lindenmayer DB, Cunningham RB (2011) Longitudinal patterns in bird reporting rates in a threatened ecosystem: is change regionally consistent? *Biol Conserv* 144: 430–440.
27. Rayner L, Lindenmayer D, Gibbons P, Manning AD (2014) Evaluating empirical evidence for decline in temperate woodland birds: a nationally threatened assemblage of species.. *Biol Conserv*: DOI: 10.1016/j.biocon.2014.1001.1029.
28. Reid JRW (1999) Threatened and declining birds in the New South Wales sheep-wheat belt: I. diagnosis, characteristics and management. Canberra: CSIRO Wildlife and Ecology.
29. Ford HA, Barrett GW, Saunders DA, Recher HF (2001) Why have birds in the woodlands of southern Australia declined? *Biol Conserv* 97: 71–88.
30. Watson DM (2011) A productivity-based explanation for woodland bird declines: poorer soils yield less food. *Emu* 111: 10–18.
31. Antos MJ, Bennett AF (2006) Foraging ecology of ground-feeding woodland birds in temperate woodlands of southern Australia. *Emu* 106: 29–40.
32. Mac Nally R, Bennett AF, Thomson JR, Radford JQ, Unmack G, et al. (2009) Collapse of an avifauna: climate change appears to exacerbate habitat loss and degradation. *Divers Distrib* 15: 720–730.
33. Cleary DF, Boyle TJ, Setyawati T, Anggrawni CD, Van Loon EE, et al. (2007) Bird species and traits associated with logged and unlogged forest in Borneo. *Ecol Appl* 17: 1184–1197.
34. Hirzel AH, Le Lay G (2008) Habitat suitability modelling and niche theory. *J Appl Ecol* 45: 1372–1381.
35. Ikin K, Knight E, Lindenmayer D, Fischer J, Manning A (2012) Linking bird species traits to vegetation characteristics in a future urban development zone: implications for urban planning. *Urban Ecosyst* 15: 961–977.
36. Hanspach J, Fischer J, Ikin K, Stott J, Law BS (2012) Using trait-based filtering as a predictive framework for conservation: a case study of bats on farms in southeastern Australia. *J Appl Ecol* 49: 842–850.
37. Williams NM, Crone EE, Roulston TaH, Minkley RL, Packer L, et al. (2010) Ecological and life-history traits predict bee species responses to environmental disturbances. *Biol Conserv* 143: 2280–2291.
38. Hausner VH, Yoccoz NG, Ims RA (2003) Selecting indicator traits for monitoring land use impacts: birds in northern coastal birch forests. *Ecol Appl* 13: 999–1012.
39. Benson J (2008) New South Wales Vegetation Classification and Assessment: Part 2 Plant communities of the NSW South-western Slopes Bioregion and update of NSW Western Plains plant communities, Version 2 of the NSWVCA database. *Cunninghamia* 104: 599–673.
40. van Dijk AJJM, Beck HE, Crosbie RS, de Jeu RAM, Liu YY, et al. (2013) The Millennium Drought in southeast Australia (2001–2009): Natural and human causes and implications for water resources, ecosystems, economy, and society. *Water Resources Research* 49: 1040–1057.
41. Semple B, Rankin M, Koen T, Geeves G (2010) A Note on Tree Deaths during the Current (2001–?) Drought in South-eastern Australia. *Australian Geographer* 41: 391–401.
42. Furby S (2002) Land cover change: specification for remote sensing analysis. National Carbon Accounting System Technical Report No. 9. Australian Greenhouse Office.
43. Rhodes J, McAlpine C, Zuur A, Smith G, Ieno E (2009) GLMM applied on the spatial distribution of koalas in a fragmented landscape. In: Zuur A, editor. *Mixed effects models and extensions in ecology with R*: Springer.
44. Cunningham RB, Lindenmayer DB, Nix HA, Lindenmayer BD (1999) Quantifying observer heterogeneity in bird counts. *Austral Ecol* 24: 270–277.
45. Tyre AJ, Tenhumberg B, Field SA, Niejalke D, Parris K, et al. (2003) Improving precision and reducing bias in biological surveys: estimating false-negative error rates. *Ecol Appl* 13: 1790–1801.
46. Gotelli NJ, Colwell RK (2001) Quantifying biodiversity: procedures and pitfalls in the measurement and comparison of species richness. *Ecol Lett* 4: 379–391.
47. Colwell RK (2013) EstimateS 9: Statistical estimation of species richness and shared species from samples. (<http://purl.oclc.org/estimates>).
48. Greenacre MJ (2007) Correspondence Analysis in Practice. London: Chapman & Hall/CRC.
49. ter Braak CJF (1986) Canonical correspondence analysis: a new eigenvector technique for multivariate direct gradient analysis. *Ecology* 67: 1167–1179.

50. HANZAB (1990–2007) Handbook of Australian, New Zealand and Antarctic birds, volumes 1–7. Melbourne: Oxford University Press.
51. Doledec S, Chessel D, Ter Braak C, Champely S (1996) Matching species traits to environmental variables: a new three-table ordination method. *Environ Ecol Stat* 3: 143–166.
52. Sozio G, Mortelliti A, Boccacci F, Ranchelli E, Battisti C, et al. (2013) Conservation of species occupying ephemeral and patchy habitats in agricultural landscapes: The case of the Eurasian reed warbler. *Landsc Urban Plan* 119: 9–19.
53. Barbaro L, Couzi L, Bretagnolle V, Nezan J, Vetillard F (2008) Multi-scale habitat selection and foraging ecology of the eurasian hoopoe (*Upupa epops*) in pine plantations. *Biodivers Conserv* 17: 1073–1087.
54. McIntyre S, Hobbs R (1999) A framework for conceptualizing human effects on landscapes and its relevance to management and research models. *Conserv Biol* 13: 1282–1292.
55. Ford HA, Walters JR, Cooper CB, Debus SJS, Doerr VAJ (2009) Extinction debt or habitat change? – Ongoing losses of woodland birds in north-eastern New South Wales, Australia. *Biol Conserv* 142: 3182–3190.
56. Kavanagh R, Stanton MA, Herring MW (2007) Eucalypt plantings on farms benefit woodland birds in south-eastern Australia. *Austral Ecol* 32: 635–650.
57. Cooper CB, Walters JR (2002) Independent effects of woodland loss and fragmentation on Brown Treecreeper distribution. *Biol Conserv* 105: 1–10.
58. Watson DM (2001) Mistletoe - A keystone resource in forests and woodlands worldwide. *Annu Rev Ecol Syst* 32: 219–249.
59. Watson DM, Herring M (2012) Mistletoe as a keystone resource: an experimental test. *Proc R Soc B* 279: 3853–3860.
60. Forman RTT (1995) Land mosaics. The ecology of landscapes and regions. Cambridge: Cambridge University Press.
61. Haila Y (2002) A conceptual genealogy of fragmentation research: from island biogeography to landscape ecology. *Ecol Appl* 12: 321–334.
62. Díaz M, Carbonell R, Santos T, Tellería JL (1998) Breeding bird communities in pine plantations of the Spanish plateaux: Biogeography, landscape and vegetation effects. *J Appl Ecol* 35: 562–574.
63. Fahrig L (2003) Effects of habitat fragmentation on biodiversity. *Annu Rev Ecol Syst* 34: 487–515.
64. Santos T, Tellería JL, Díaz M, Carbonell R (2006) Evaluating the benefits of CAP reforms: Can afforestations restore bird diversity in Mediterranean Spain? *Basic Appl Ecol* 7: 483–495.
65. Franklin J, Lindenmayer DB (2009) Importance of matrix habitats in maintaining biological diversity. *PNAS* 106: 349–350.
66. Prugh LR, Hodges KE, Sinclair ARE, Brashares JS (2008) Effect of habitat area and isolation on fragmented animal populations. *PNAS* 105: 20770–20775.
67. Leech DI, Crick HQP (2007) Influence of climate change on the abundance, distribution and phenology of woodland bird species in temperate regions. *Ibis* 149 (Suppl. 2), 128–145.
68. Walther G-R (2010) Community and ecosystem responses to recent climate change. *Philosophical Transactions of the Royal Society B: Biological Sciences* 365: 2019–2024.
69. Jiguet F, Brotons L, Devictor V (2011) Community responses to extreme climatic conditions. *Current Zoology* 57: 406–413.
70. Alarcón R, Waser NM, Ollerton J (2008) Year-to-year variation in the topology of a plant–pollinator interaction network. *Oikos* 117: 1796–1807.
71. IPCC (2012) Managing the Risks of Extreme Events and Disasters to Advance Climate Change Adaptation. A Special Report of Working Groups I and II of the Intergovernmental Panel on Climate Change In: Field CB, Barros V, Stocker F, Qin D, Dokken DJ et al., editors. Cambridge, UK, and New York, USA: Cambridge University Press.
72. Whetton P (2011) Future Australian climate scenarios. In: Cleugh H, Stafford Smith M, Battaglia M, Graham P, editors. *Climate Change: Science and Solutions for Australia* Canberra: CSIRO.
73. Lindenmayer DB, Likens GE (2009) Adaptive monitoring: a new paradigm for long-term research and monitoring. *Trends Ecol Evol* 24: 482–486.
74. Bowen ME, McAlpine CA, House APN, Smith GC (2009) Agricultural landscape modification increases the abundance of an important food resource: Mistletoes, birds and brigalow. *Biol Conserv* 142: 122–133.
75. Manning AD, Lindenmayer DB, Barry S (2004) The conservation implications of bird reproduction in the agricultural ‘matrix’: a case study of the vulnerable superb parrot of south-eastern Australia. *Biol Conserv* 120: 363–374.
76. Lindenmayer DB, Hobbs R, Montague-Drake R, Alexandra J, Bennett AF, et al. (2008) A checklist for ecological management of landscapes for conservation. *Ecol Lett* 11: 78–91.
77. Bruton MJ, McAlpine CA, Maron M (2013) Regrowth woodlands are valuable habitat for reptile communities. *Biol Conserv* 165: 95–103.
78. Rey Benayas JM, Bullock JM, Newton AC (2008) Creating woodland islets to reconcile ecological restoration, conservation and agricultural land use. *Front Ecol Environ* 6: 329–326.
79. Cunningham RB, Lindenmayer DB, Crane M, Michael D, MacGregor C, et al. (2008) The combined effects of remnant vegetation and tree planting on farmland birds. *Conserv Biol* 22: 742–752.
80. Lindenmayer DB, Knight EJ, Crane MJ, Montague-Drake R, Michael DR, et al. (2010) What makes an effective restoration planting for woodland birds? *Biol Conserv* 143: 289–301.
81. Booth TH, Williams KJ (2012) Developing biodiverse plantings suitable for changing climatic conditions 1: Underpinning scientific methods. *Ecol Manag Restor* 13: 267–273.
82. Martínez-Garza C, Tobon W, Campo J, Howe HF (2011) Drought mortality of tree seedlings in an eroded tropical pasture. *Land Degradation & Development*: 10.1002/ldr.1127.
83. Tschamtké T, Klein AM, Krüess A, Steffan-Dewenter I, Thies C (2005) Landscape perspectives on agricultural intensification and biodiversity – ecosystem service management. *Ecol Lett* 8: 857–874.
84. Kleijn D, Rundlöf M, Scheper J, Smith HG, Tschamtké T (2011) Does conservation on farmland contribute to halting the biodiversity decline? *Trends Ecol Evol* 26: 474–481.
85. Michael DR, Wood JT, Crane M, Montague-Drake R, Lindenmayer DB (2014) How effective are agri-environment schemes for protecting and improving herpetofaunal diversity in Australian endangered woodland ecosystems? *J Appl Ecol*: DOI: 10.1111/1365-2664.12215.
86. Vögeli M, Serrano D, Pacios F, Tella JL (2010) The relative importance of patch habitat quality and landscape attributes on a declining steppe-bird metapopulation. *Biol Conserv* 143: 1057–1067.
